# Supplementary material
Source: PubMed Central journal article supplement (PMC4006398)
Supplement: ct400995c_si_001.pdf [file ct400995c_si_001.pdf]

## Supporting Information

Bringing clarity to the prediction of protein-ligand binding free energies via  
“blurring”

Melek N. Ucisik, Zheng Zheng, John C. Faver, Kenneth M. Merz Jr.

Department of Chemistry and the Quantum Theory Project, University of Florida,  
Gainesville, Florida 32611, USA

## GAFF Parameter Files for the Ligands (.frcmmod)

### Benzene:

remark goes here

MASS

BOND

ANGLE

DIHE

IMPROPER

|             |     |       |     |                                                            |
|-------------|-----|-------|-----|------------------------------------------------------------|
| ca-ca-ca-ha | 1.1 | 180.0 | 2.0 | General improper torsional angle<br>(2 general atom types) |
|-------------|-----|-------|-----|------------------------------------------------------------|

NONBON

### Benzofuran:

remark goes here

MASS

BOND

ANGLE

DIHE

|             |   |       |         |       |                    |
|-------------|---|-------|---------|-------|--------------------|
| cc-cd-ca-ca | 1 | 2.550 | 180.000 | 2.000 | same as X -c2-ca-X |
| cd-cc-os-ca | 1 | 1.050 | 180.000 | 2.000 | same as X -c2-os-X |
| ca-ca-cd-ha | 1 | 2.550 | 180.000 | 2.000 | same as X -c2-ca-X |
| ca-os-cc-h4 | 1 | 1.050 | 180.000 | 2.000 | same as X -c2-os-X |

IMPROPER

|             |     |       |     |                                                            |
|-------------|-----|-------|-----|------------------------------------------------------------|
| cd-h4-cc-os | 1.1 | 180.0 | 2.0 | Using default value                                        |
| ca-cc-cd-ha | 1.1 | 180.0 | 2.0 | Using default value                                        |
| ca-ca-ca-cd | 1.1 | 180.0 | 2.0 | Using default value                                        |
| ca-ca-ca-ha | 1.1 | 180.0 | 2.0 | General improper torsional angle<br>(2 general atom types) |
| ca-ca-ca-os | 1.1 | 180.0 | 2.0 | Using default value                                        |

NONBON

### Indene:

remark goes here  
MASS

BOND

ANGLE

DIHE

|             |   |       |         |       |                    |
|-------------|---|-------|---------|-------|--------------------|
| c2-ce-ca-ca | 1 | 2.550 | 180.000 | 2.000 | same as X -c2-ca-X |
| ca-ca-ce-ha | 1 | 6.650 | 180.000 | 2.000 | same as X -c2-ce-X |

IMPROPER

|                        |     |       |     |                                  |
|------------------------|-----|-------|-----|----------------------------------|
| c3-ce-c2-ha            | 1.1 | 180.0 | 2.0 | Using default value              |
| c2-ca-ce-ha            | 1.1 | 180.0 | 2.0 | Using default value              |
| ca-ca-ca-ha            | 1.1 | 180.0 | 2.0 | General improper torsional angle |
| (2 general atom types) |     |       |     |                                  |
| ca-ca-ca-ce            | 1.1 | 180.0 | 2.0 | Using default value              |

NONBON

**Isobutylbenzene:**

remark goes here  
MASS

BOND

ANGLE

DIHE

IMPROPER

|                        |     |       |     |                                  |
|------------------------|-----|-------|-----|----------------------------------|
| ca-ca-ca-ha            | 1.1 | 180.0 | 2.0 | General improper torsional angle |
| (2 general atom types) |     |       |     |                                  |

NONBON

**Indole:**

remark goes here  
MASS

BOND

ANGLE

|             |   |       |         |       |                    |
|-------------|---|-------|---------|-------|--------------------|
| DIHE        |   |       |         |       |                    |
| cc-cd-ca-ca | 1 | 2.550 | 180.000 | 2.000 | same as X -c2-ca-X |
| ca-ca-cd-ha | 1 | 2.550 | 180.000 | 2.000 | same as X -c2-ca-X |

|                        |     |       |     |                                  |  |
|------------------------|-----|-------|-----|----------------------------------|--|
| IMPROPER               |     |       |     |                                  |  |
| ca-cc-na-hn            | 1.1 | 180.0 | 2.0 | General improper torsional angle |  |
| (2 general atom types) |     |       |     |                                  |  |
| cd-h4-cc-na            | 1.1 | 180.0 | 2.0 | Using default value              |  |
| ca-cc-cd-ha            | 1.1 | 180.0 | 2.0 | Using default value              |  |
| ca-ca-ca-ha            | 1.1 | 180.0 | 2.0 | General improper torsional angle |  |
| (2 general atom types) |     |       |     |                                  |  |
| ca-ca-ca-na            | 1.1 | 180.0 | 2.0 | Using default value              |  |
| ca-ca-ca-cd            | 1.1 | 180.0 | 2.0 | Using default value              |  |

NONBON

**n-butyl benzene:**

remark goes here  
 MASS

BOND

ANGLE

DIHE

|                        |     |       |     |                                  |  |
|------------------------|-----|-------|-----|----------------------------------|--|
| IMPROPER               |     |       |     |                                  |  |
| ca-ca-ca-ha            | 1.1 | 180.0 | 2.0 | General improper torsional angle |  |
| (2 general atom types) |     |       |     |                                  |  |

NONBON

**p-xylene:**

remark goes here  
 MASS

BOND

ANGLE

DIHE

|             |     |       |     |                                  |  |
|-------------|-----|-------|-----|----------------------------------|--|
| IMPROPER    |     |       |     |                                  |  |
| ca-ca-ca-ha | 1.1 | 180.0 | 2.0 | General improper torsional angle |  |

(2 general atom types)

NONBON

**o-xylene:**

remark goes here

MASS

BOND

ANGLE

DIHE

IMPROPER

ca-ca-ca-ha 1.1 180.0 2.0 General improper torsional angle  
(2 general atom types)

NONBON

### Coordinate files for the initial ligand poses:

**Benzene:**

@<TRIPOS>MOLECULE

BNZ

12 12 1 0 0

SMALL

bcc

@<TRIPOS>ATOM

|   |    |         |        |        |    |   |     |           |
|---|----|---------|--------|--------|----|---|-----|-----------|
| 1 | C1 | 25.9610 | 5.3060 | 4.7870 | ca | 1 | BNZ | -0.130000 |
| 2 | C2 | 26.3840 | 5.0360 | 3.4850 | ca | 1 | BNZ | -0.130000 |
| 3 | C3 | 27.3330 | 5.8560 | 2.8760 | ca | 1 | BNZ | -0.130000 |
| 4 | C4 | 27.8610 | 6.9450 | 3.5700 | ca | 1 | BNZ | -0.130000 |
| 5 | C5 | 27.4390 | 7.2150 | 4.8710 | ca | 1 | BNZ | -0.130000 |
| 6 | C6 | 26.4890 | 6.3950 | 5.4800 | ca | 1 | BNZ | -0.130000 |
| 7 | H1 | 25.2190 | 4.6650 | 5.2620 | ha | 1 | BNZ | 0.130000  |
| 8 | H2 | 25.9710 | 4.1850 | 2.9430 | ha | 1 | BNZ | 0.130000  |
| 9 | H3 | 27.6630 | 5.6460 | 1.8590 | ha | 1 | BNZ | 0.130000  |

|       |         |        |           |       |          |
|-------|---------|--------|-----------|-------|----------|
| 10 H4 | 28.6030 | 7.5860 | 3.0940 ha | 1 BNZ | 0.130000 |
| 11 H5 | 27.8510 | 8.0660 | 5.4130 ha | 1 BNZ | 0.130000 |
| 12 H6 | 26.1590 | 6.6050 | 6.4970 ha | 1 BNZ | 0.130000 |

@<TRIPOS>BOND

|    |   |      |
|----|---|------|
| 1  | 1 | 2 ar |
| 2  | 1 | 6 ar |
| 3  | 1 | 7 1  |
| 4  | 2 | 3 ar |
| 5  | 2 | 8 1  |
| 6  | 3 | 4 ar |
| 7  | 3 | 9 1  |
| 8  | 4 | 5 ar |
| 9  | 4 | 10 1 |
| 10 | 5 | 6 ar |
| 11 | 5 | 11 1 |
| 12 | 6 | 12 1 |

@<TRIPOS>SUBSTRUCTURE

|       |        |        |      |        |
|-------|--------|--------|------|--------|
| 1 BNZ | 1 TEMP | 0 **** | **** | 0 ROOT |
|-------|--------|--------|------|--------|

**Benzofuran:**

@<TRIPOS>MOLECULE

BZF

|    |    |   |   |   |
|----|----|---|---|---|
| 15 | 16 | 1 | 0 | 0 |
|----|----|---|---|---|

SMALL

bcc

@<TRIPOS>ATOM

|       |         |        |           |       |           |
|-------|---------|--------|-----------|-------|-----------|
| 1 O1  | 27.6870 | 6.1320 | 2.2450 os | 1 BZF | -0.204200 |
| 2 C2  | 28.4050 | 7.3130 | 2.4230 cc | 1 BZF | -0.014900 |
| 3 C3  | 28.2790 | 7.9020 | 3.6620 cd | 1 BZF | -0.177200 |
| 4 C3A | 27.4020 | 7.0140 | 4.3330 ca | 1 BZF | -0.106800 |
| 5 C4  | 26.8980 | 7.0750 | 5.6280 ca | 1 BZF | -0.083000 |
| 6 C5  | 26.0380 | 6.0520 | 6.0410 ca | 1 BZF | -0.149000 |
| 7 C6  | 25.7030 | 5.0060 | 5.1680 ca | 1 BZF | -0.113000 |
| 8 C7  | 26.2250 | 4.9710 | 3.8690 ca | 1 BZF | -0.121000 |
| 9 C7A | 27.0780 | 5.9950 | 3.4740 ca | 1 BZF | 0.058100  |
| 10 H2 | 28.9740 | 7.6140 | 1.5470 h4 | 1 BZF | 0.189000  |
| 11 H3 | 28.7450 | 8.8190 | 4.0180 ha | 1 BZF | 0.165000  |
| 12 H4 | 27.1650 | 7.8910 | 6.2980 ha | 1 BZF | 0.138000  |
| 13 H5 | 25.6250 | 6.0680 | 7.0490 ha | 1 BZF | 0.133000  |
| 14 H6 | 25.0320 | 4.2150 | 5.5020 ha | 1 BZF | 0.135000  |
| 15 H7 | 25.9720 | 4.1640 | 3.1840 ha | 1 BZF | 0.150000  |

@<TRIPOS>BOND

|   |   |      |
|---|---|------|
| 1 | 1 | 2 1  |
| 2 | 1 | 9 1  |
| 3 | 2 | 3 2  |
| 4 | 2 | 10 1 |
| 5 | 3 | 4 1  |

6 3 11 1  
7 4 5 ar  
8 4 9 ar  
9 5 6 ar  
10 5 12 1  
11 6 7 ar  
12 6 13 1  
13 7 8 ar  
14 7 14 1  
15 8 9 ar  
16 8 15 1

@<TRIPOS>SUBSTRUCTURE  
1 BZF 1 TEMP 0 \*\*\*\* \*\* 0 ROOT

### Indene:

@<TRIPOS>MOLECULE  
DEN  
17 18 1 0 0  
SMALL  
bcc

@<TRIPOS>ATOM

|        |         |        |           |       |           |
|--------|---------|--------|-----------|-------|-----------|
| 1 C1   | 27.8930 | 8.1940 | 4.3020 c3 | 1 DEN | -0.019900 |
| 2 C2   | 28.2820 | 7.9480 | 2.8530 c2 | 1 DEN | -0.173200 |
| 3 C3   | 27.7850 | 6.7910 | 2.3920 ce | 1 DEN | -0.117200 |
| 4 C4   | 26.3290 | 4.9370 | 3.4480 ca | 1 DEN | -0.107000 |
| 5 C5   | 25.6760 | 4.5490 | 4.6230 ca | 1 DEN | -0.133000 |
| 6 C6   | 25.7240 | 5.3600 | 5.7650 ca | 1 DEN | -0.129000 |
| 7 C7   | 26.4260 | 6.5710 | 5.7510 ca | 1 DEN | -0.115000 |
| 8 C8   | 27.0720 | 6.9450 | 4.5770 ca | 1 DEN | -0.094300 |
| 9 C9   | 27.0210 | 6.1420 | 3.4560 ca | 1 DEN | -0.071800 |
| 10 H11 | 28.7680 | 8.2500 | 4.9550 hc | 1 DEN | 0.074700  |
| 11 H12 | 27.2920 | 9.1000 | 4.4130 hc | 1 DEN | 0.074700  |
| 12 H22 | 28.8940 | 8.6500 | 2.2880 ha | 1 DEN | 0.142000  |
| 13 H32 | 27.8990 | 6.3550 | 1.3970 ha | 1 DEN | 0.144000  |
| 14 H4  | 26.2980 | 4.3140 | 2.5560 ha | 1 DEN | 0.134000  |
| 15 H5  | 25.1250 | 3.6100 | 4.6490 ha | 1 DEN | 0.130000  |
| 16 H6  | 25.2100 | 5.0460 | 6.6730 ha | 1 DEN | 0.130000  |
| 17 H7  | 26.4660 | 7.2040 | 6.6370 ha | 1 DEN | 0.132000  |

@<TRIPOS>BOND

|   |   |      |
|---|---|------|
| 1 | 1 | 2 1  |
| 2 | 1 | 8 1  |
| 3 | 1 | 10 1 |
| 4 | 1 | 11 1 |
| 5 | 2 | 3 2  |
| 6 | 2 | 12 1 |
| 7 | 3 | 9 1  |
| 8 | 3 | 13 1 |
| 9 | 4 | 5 ar |

10 4 9 ar  
11 4 14 1  
12 5 6 ar  
13 5 15 1  
14 6 7 ar  
15 6 16 1  
16 7 8 ar  
17 7 17 1  
18 8 9 ar

@<TRIPOS>SUBSTRUCTURE  
1 DEN 1 TEMP 0 \*\*\*\* \*\* 0 ROOT

### Isobutylbenzene:

@<TRIPOS>MOLECULE  
I4B  
24 24 1 0 0  
SMALL  
bcc

@<TRIPOS>ATOM

|         |         |         |         |    |       |           |
|---------|---------|---------|---------|----|-------|-----------|
| 1 C1    | 27.2970 | 6.7760  | 3.4620  | ca | 1 I4B | -0.075300 |
| 2 C2    | 27.2970 | 7.2570  | 4.7730  | ca | 1 I4B | -0.128500 |
| 3 C3    | 26.5700 | 6.5980  | 5.7640  | ca | 1 I4B | -0.128500 |
| 4 C4    | 25.8400 | 5.4530  | 5.4490  | ca | 1 I4B | -0.134000 |
| 5 C5    | 25.8390 | 4.9680  | 4.1430  | ca | 1 I4B | -0.128500 |
| 6 C6    | 26.5660 | 5.6270  | 3.1520  | ca | 1 I4B | -0.128500 |
| 7 C1a   | 28.0920 | 7.4910  | 2.3770  | c3 | 1 I4B | -0.036100 |
| 8 C2a   | 27.2090 | 8.3350  | 1.4260  | c3 | 1 I4B | -0.063700 |
| 9 C3a   | 28.0620 | 8.9030  | 0.2710  | c3 | 1 I4B | -0.091100 |
| 10 C4a  | 26.5070 | 9.4890  | 2.1770  | c3 | 1 I4B | -0.091100 |
| 11 H2   | 27.8630 | 8.1520  | 5.0270  | ha | 1 I4B | 0.131000  |
| 12 H3   | 26.5710 | 6.9790  | 6.7850  | ha | 1 I4B | 0.130000  |
| 13 H4   | 25.2710 | 4.9390  | 6.2230  | ha | 1 I4B | 0.130000  |
| 14 H5   | 25.2690 | 4.0720  | 3.8950  | ha | 1 I4B | 0.130000  |
| 15 H6   | 26.5610 | 5.2420  | 2.1330  | ha | 1 I4B | 0.131000  |
| 16 H1a1 | 28.8520 | 8.1300  | 2.8340  | hc | 1 I4B | 0.048200  |
| 17 H1a2 | 28.6320 | 6.7410  | 1.7930  | hc | 1 I4B | 0.048200  |
| 18 H2a  | 26.4410 | 7.6880  | 0.9930  | hc | 1 I4B | 0.050700  |
| 19 H3a1 | 28.5350 | 8.0940  | -0.2920 | hc | 1 I4B | 0.034700  |
| 20 H3a2 | 28.8470 | 9.5610  | 0.6530  | hc | 1 I4B | 0.034700  |
| 21 H3a3 | 27.4400 | 9.4750  | -0.4210 | hc | 1 I4B | 0.034700  |
| 22 H4a1 | 27.2380 | 10.1470 | 2.6520  | hc | 1 I4B | 0.034700  |
| 23 H4a2 | 25.8390 | 9.1010  | 2.9500  | hc | 1 I4B | 0.034700  |
| 24 H4a3 | 25.9060 | 10.0850 | 1.4870  | hc | 1 I4B | 0.034700  |

@<TRIPOS>BOND  
1 1 2 ar  
2 1 6 ar  
3 1 7 1  
4 2 3 ar



```

5 2 11 1
6 3 4 ar
7 3 12 1
8 4 5 ar
9 4 13 1
10 5 6 ar
11 5 14 1
12 6 15 1
13 7 8 1
14 7 16 1
15 7 17 1
16 8 9 1
17 8 10 1
18 8 18 1
19 9 19 1
20 9 20 1
21 9 21 1
22 10 22 1
23 10 23 1
24 10 24 1

```

@<TRIPOS>SUBSTRUCTURE

```

1 I4B      1 TEMP      0 ****  ****  0 ROOT

```

### Indole:

@<TRIPOS>MOLECULE

IND

```

16 17 1 0 0

```

SMALL

bcc

@<TRIPOS>ATOM

|       |         |        |        |    |       |           |
|-------|---------|--------|--------|----|-------|-----------|
| 1 N1  | 28.5630 | 7.3530 | 3.2020 | na | 1 IND | -0.196400 |
| 2 C2  | 28.3720 | 6.5850 | 2.0520 | cc | 1 IND | -0.109100 |
| 3 C3  | 27.4350 | 5.6000 | 2.3200 | cd | 1 IND | -0.187200 |
| 4 C4  | 26.1540 | 5.0890 | 4.4640 | ca | 1 IND | -0.082000 |
| 5 C5  | 25.9840 | 5.5100 | 5.7880 | ca | 1 IND | -0.159000 |
| 6 C6  | 26.7070 | 6.6040 | 6.2890 | ca | 1 IND | -0.113000 |
| 7 C7  | 27.6110 | 7.2920 | 5.4710 | ca | 1 IND | -0.146000 |
| 8 C8  | 27.7600 | 6.8520 | 4.1610 | ca | 1 IND | -0.047200 |
| 9 C9  | 27.0580 | 5.7900 | 3.6750 | ca | 1 IND | -0.095800 |
| 10 H1 | 29.1910 | 8.1450 | 3.3010 | hn | 1 IND | 0.297700  |
| 11 H2 | 28.9190 | 6.8040 | 1.1370 | h4 | 1 IND | 0.163000  |
| 12 H3 | 27.0740 | 4.8440 | 1.6260 | ha | 1 IND | 0.156000  |
| 13 H4 | 25.5980 | 4.2410 | 4.0650 | ha | 1 IND | 0.133000  |
| 14 H5 | 25.2830 | 4.9830 | 6.4360 | ha | 1 IND | 0.128000  |
| 15 H6 | 26.5640 | 6.9200 | 7.3220 | ha | 1 IND | 0.128000  |
| 16 H7 | 28.1770 | 8.1420 | 5.8500 | ha | 1 IND | 0.130000  |

@<TRIPOS>BOND

```

1 1 2 1

```

```

2 1 8 1
3 1 10 1
4 2 3 2
5 2 11 1
6 3 9 1
7 3 12 1
8 4 5 ar
9 4 9 ar
10 4 13 1
11 5 6 ar
12 5 14 1
13 6 7 ar
14 6 15 1
15 7 8 ar
16 7 16 1
17 8 9 ar

```

```

@<TRIPOS>SUBSTRUCTURE
1 IND      1 TEMP      0 ****  ****  0 ROOT

```

**n-butyl benzene:**

```

@<TRIPOS>MOLECULE
N4B
24 24 1 0 0
SMALL
bcc

```

```

@<TRIPOS>ATOM
1 C1      27.5030  7.0450  3.9350 ca    1 N4B  -0.075300
2 C2      26.8940  7.0570  5.1920 ca    1 N4B  -0.129000
3 C3      26.0750  6.0000  5.5870 ca    1 N4B  -0.128500
4 C4      25.8600  4.9250  4.7270 ca    1 N4B  -0.134000
5 C5      26.4670  4.9060  3.4720 ca    1 N4B  -0.128500
6 C6      27.2870  5.9630  3.0780 ca    1 N4B  -0.129000
7 C1a     28.3980  8.2010  3.5090 c3    1 N4B  -0.038100
8 C2a     27.6080  9.4730  3.1170 c3    1 N4B  -0.073400
9 C3a     26.6610  9.2820  1.9070 c3    1 N4B  -0.082400
10 C4a    27.4130  8.9860  0.5930 c3    1 N4B  -0.092100
11 H2     27.0580  7.8950  5.8690 ha    1 N4B   0.130500
12 H3     25.6020  6.0160  6.5690 ha    1 N4B   0.130000
13 H4     25.2200  4.0990  5.0350 ha    1 N4B   0.130000
14 H5     26.3000  4.0660  2.7990 ha    1 N4B   0.130000
15 H6     27.7560  5.9410  2.0960 ha    1 N4B   0.130500
16 H1a1   29.0660  8.4500  4.3370 hc    1 N4B   0.047700
17 H1a2   29.0450  7.8940  2.6840 hc    1 N4B   0.047700
18 H2a1   27.0190  9.8020  3.9760 hc    1 N4B   0.041200
19 H2a2   28.3150  10.2770  2.8960 hc    1 N4B   0.041200
20 H3a1   25.9470  8.4810  2.1100 hc    1 N4B   0.043200
21 H3a2   26.0790  10.1980  1.7750 hc    1 N4B   0.043200
22 H4a1   28.1460  9.7690  0.3830 hc    1 N4B   0.031700

```

|         |         |        |            |       |          |
|---------|---------|--------|------------|-------|----------|
| 23 H4a2 | 27.9300 | 8.0270 | 0.6400 hc  | 1 N4B | 0.031700 |
| 24 H4a3 | 26.7080 | 8.9470 | -0.2400 hc | 1 N4B | 0.031700 |

@<TRIPOS>BOND

|    |    |    |    |
|----|----|----|----|
| 1  | 1  | 2  | ar |
| 2  | 1  | 6  | ar |
| 3  | 1  | 7  | 1  |
| 4  | 2  | 3  | ar |
| 5  | 2  | 11 | 1  |
| 6  | 3  | 4  | ar |
| 7  | 3  | 12 | 1  |
| 8  | 4  | 5  | ar |
| 9  | 4  | 13 | 1  |
| 10 | 5  | 6  | ar |
| 11 | 5  | 14 | 1  |
| 12 | 6  | 15 | 1  |
| 13 | 7  | 8  | 1  |
| 14 | 7  | 16 | 1  |
| 15 | 7  | 17 | 1  |
| 16 | 8  | 9  | 1  |
| 17 | 8  | 18 | 1  |
| 18 | 8  | 19 | 1  |
| 19 | 9  | 10 | 1  |
| 20 | 9  | 20 | 1  |
| 21 | 9  | 21 | 1  |
| 22 | 10 | 22 | 1  |
| 23 | 10 | 23 | 1  |
| 24 | 10 | 24 | 1  |

@<TRIPOS>SUBSTRUCTURE

|       |        |        |      |        |
|-------|--------|--------|------|--------|
| 1 N4B | 1 TEMP | 0 **** | **** | 0 ROOT |
|-------|--------|--------|------|--------|

**p-xylene:**

@<TRIPOS>MOLECULE

PXY

|    |    |   |   |   |
|----|----|---|---|---|
| 18 | 18 | 1 | 0 | 0 |
|----|----|---|---|---|

SMALL

bcc

@<TRIPOS>ATOM

|       |         |        |           |       |           |
|-------|---------|--------|-----------|-------|-----------|
| 1 C1  | 26.6430 | 6.1260 | 4.7030 ca | 1 PXY | -0.082300 |
| 2 C2  | 26.7880 | 5.6320 | 3.4060 ca | 1 PXY | -0.127000 |
| 3 C3  | 27.2620 | 6.4580 | 2.3880 ca | 1 PXY | -0.127000 |
| 4 C4  | 27.5950 | 7.7860 | 2.6570 ca | 1 PXY | -0.082300 |
| 5 C5  | 27.4510 | 8.2810 | 3.9550 ca | 1 PXY | -0.127000 |
| 6 C6  | 26.9770 | 7.4540 | 4.9730 ca | 1 PXY | -0.127000 |
| 7 C1a | 26.1260 | 5.2180 | 5.8050 c3 | 1 PXY | -0.052800 |
| 8 C4a | 28.1110 | 8.6780 | 1.5410 c3 | 1 PXY | -0.052800 |
| 9 H2  | 26.5300 | 4.5970 | 3.1850 ha | 1 PXY | 0.130000  |
| 10 H3 | 27.3710 | 6.0630 | 1.3790 ha | 1 PXY | 0.130000  |
| 11 H5 | 27.7080 | 9.3150 | 4.1790 ha | 1 PXY | 0.130000  |

|         |         |        |           |       |          |
|---------|---------|--------|-----------|-------|----------|
| 12 H6   | 26.8690 | 7.8520 | 5.9810 ha | 1 PXY | 0.130000 |
| 13 H1a1 | 26.0600 | 5.7460 | 6.7590 hc | 1 PXY | 0.043200 |
| 14 H1a2 | 26.7920 | 4.3620 | 5.9370 hc | 1 PXY | 0.043200 |
| 15 H1a3 | 25.1310 | 4.8430 | 5.5550 hc | 1 PXY | 0.043200 |
| 16 H4a1 | 28.3020 | 9.6920 | 1.8980 hc | 1 PXY | 0.043200 |
| 17 H4a2 | 29.0430 | 8.2790 | 1.1350 hc | 1 PXY | 0.043200 |
| 18 H4a3 | 27.3800 | 8.7350 | 0.7310 hc | 1 PXY | 0.043200 |

@<TRIPOS>BOND

```

1 1 2 ar
2 1 6 ar
3 1 7 1
4 2 3 ar
5 2 9 1
6 3 4 ar
7 3 10 1
8 4 5 ar
9 4 8 1
10 5 6 ar
11 5 11 1
12 6 12 1
13 7 13 1
14 7 14 1
15 7 15 1
16 8 16 1
17 8 17 1
18 8 18 1

```

@<TRIPOS>SUBSTRUCTURE

```

1 PXY      1 TEMP      0 ****  ****  0 ROOT

```

**o-xylene:**

@<TRIPOS>MOLECULE

OXE

```

18 18 1 0 0

```

SMALL

bcc

@<TRIPOS>ATOM

|       |         |        |           |       |           |
|-------|---------|--------|-----------|-------|-----------|
| 1 C1  | 27.1800 | 7.4890 | 4.4750 ca | 1 OXE | -0.078300 |
| 2 C2  | 27.6450 | 6.9130 | 3.2830 ca | 1 OXE | -0.078300 |
| 3 C3  | 27.3150 | 5.5880 | 2.9830 ca | 1 OXE | -0.127000 |
| 4 C4  | 26.5320 | 4.8380 | 3.8580 ca | 1 OXE | -0.132000 |
| 5 C5  | 26.0710 | 5.4090 | 5.0400 ca | 1 OXE | -0.132000 |
| 6 C6  | 26.3940 | 6.7290 | 5.3460 ca | 1 OXE | -0.127000 |
| 7 C11 | 27.5150 | 8.9290 | 4.8400 c3 | 1 OXE | -0.051800 |
| 8 C21 | 28.5030 | 7.7040 | 2.3040 c3 | 1 OXE | -0.051800 |
| 9 H3  | 27.6710 | 5.1310 | 2.0600 ha | 1 OXE | 0.130000  |
| 10 H4 | 26.2800 | 3.8060 | 3.6160 ha | 1 OXE | 0.130000  |
| 11 H5 | 25.4580 | 4.8250 | 5.7260 ha | 1 OXE | 0.130000  |

|    |      |         |        |        |    |       |          |
|----|------|---------|--------|--------|----|-------|----------|
| 12 | H6   | 26.0280 | 7.1660 | 6.2750 | ha | 1 OXE | 0.130000 |
| 13 | H111 | 27.0660 | 9.2110 | 5.7960 | hc | 1 OXE | 0.043367 |
| 14 | H112 | 28.5950 | 9.0630 | 4.9260 | hc | 1 OXE | 0.043367 |
| 15 | H113 | 27.1390 | 9.6160 | 4.0790 | hc | 1 OXE | 0.043367 |
| 16 | H211 | 29.4250 | 8.0380 | 2.7850 | hc | 1 OXE | 0.043367 |
| 17 | H212 | 28.7790 | 7.0990 | 1.4380 | hc | 1 OXE | 0.043367 |
| 18 | H213 | 27.9630 | 8.5810 | 1.9410 | hc | 1 OXE | 0.043367 |

```

@<TRIPOS>BOND
1 1 2 ar
2 1 6 ar
3 1 7 1
4 2 3 ar
5 2 8 1
6 3 4 ar
7 3 9 1
8 4 5 ar
9 4 10 1
10 5 6 ar
11 5 11 1
12 6 12 1
13 7 13 1
14 7 14 1
15 7 15 1
16 8 16 1
17 8 17 1
18 8 18 1
@<TRIPOS>SUBSTRUCTURE
1 OXE      1 TEMP      0 ****  ****  0 ROOT

```

**Table SI.1.** Experimental binding free energies along with the Glide SP and Glide XP docking scores obtained for the top hits from the standard docking protocol.<sup>1-3</sup> The receptor structures were prepared with the Protein Preparation Wizard utility of the Schrodinger 2013-2 Suite using Epik state penalties.<sup>1,4</sup> Protonation states were assigned via PROPKA at pH 7.0.<sup>5,6</sup> Hydrogen positions were optimized with the OPLS 2005 force field.<sup>7,8</sup> Docking was carried out using the Standard Precision (SP) and Extra Precision (XP) algorithms of Glide version 5.9. Experimental free energy of binding values are in kcal/mol.

| PDB  | Ligand          | Exp. $\Delta G_{\text{bind}}$ | Glide SP Score for the top hit | Glide XP Score for the top hit |
|------|-----------------|-------------------------------|--------------------------------|--------------------------------|
| 181L | benzene         | -5.2                          | -5.67                          | -5.00                          |
| 182L | 2,3-benzofuran  | -5.5                          | -6.93                          | -6.85                          |
| 183L | indene          | -5.1                          | -7.39                          | -7.25                          |
| 184L | i-Butyl benzene | -6.5                          | -7.72                          | -7.61                          |
| 185L | indole          | -4.9                          | -6.75                          | -5.96                          |
| 186L | n-Butyl benzene | -6.7                          | -7.03                          | -7.32                          |
| 187L | p-xylene        | -4.7                          | -6.71                          | -6.36                          |
| 188L | o-xylene        | -4.6                          | -6.75                          | -6.34                          |

## References

1. Friesner, R. A.; Banks, J. L.; Murphy, R. B.; Halgren, T. A.; Klicic, J. J.; Mainz, D. T.; Repasky, M. P.; Knoll, E. H.; Shelley, M.; Perry, J. K.; Shaw, D. E.; Francis, P.; Shenkin, P. S. *J Med Chem* **2004**, *47*, 1739.
2. Friesner, R. A.; Murphy, R. B.; Repasky, M. P.; Frye, L. L.; Greenwood, J. R.; Halgren, T. A.; Sanschagrin, P. C.; Mainz, D. T. *J Med Chem* **2006**, *49*, 6177.
3. Halgren, T. A.; Murphy, R. B.; Friesner, R. A.; Beard, H. S.; Frye, L. L.; Pollard, W. T.; Banks, J. L. *J Med Chem* **2004**, *47*, 1750.
4. Sastry, G. M.; Adzhigirey, M.; Day, T.; Annabhimoju, R.; Sherman, W. J. *Comput.-Aided Mol. Des.* **2013**, *27*, 221.
5. Rostkowski, M.; Olsson, M. H. M.; Sondergaard, C. R.; Jensen, J. H. *Bmc Struct Biol* **2011**, *11*, 6.
6. Olsson, M. H. M.; Sondergaard, C. R.; Rostkowski, M.; Jensen, J. H. *J. Chem. Theory Comput.* **2011**, *7*, 525.
7. Jorgensen, W. L.; Tiradorives, J. *J Am Chem Soc* **1988**, *110*, 1657.

8. Kaminski, G. A.; Friesner, R. A.; Tirado-Rives, J.; Jorgensen, W. L. *J. Phys. Chem. B* **2001**, *105*, 6474.
